# Supplementary material for: Effect of water content on the homogeneous catalytic process of N-vinyl pyrrolidone synthesis from acetylene
Source: Royal Society of Chemistry journal article supplement (doi:10.1039/d3re00652b), 2024-01-01
Supplement: d3re00652b1.pdf [file d3re00652b1.pdf]

## Effect of water content on the homogeneous catalytic process of N-vinyl pyrrolidone synthesis from acetylene

Jiahe Fan<sup>1</sup>, Yao Mu<sup>1</sup>, Shuairan Qian<sup>1</sup>, Bozhao Chu<sup>2</sup>, Siqing Zhong<sup>2</sup>, Yi Cheng<sup>1</sup>

<sup>1</sup> Department of Chemical Engineering, Tsinghua University, Beijing 100084, China

<sup>2</sup> Sinopec Shanghai Research Institute of Petrochemical Technology, Shanghai 201208, China.

### 1. Solvent model parameter customisation

The SMD model in Gaussian supports custom solvent parameters. In this study, the pure liquid-phase reactant 2-pyrrolidone is treated as the solvent in the calculation process. Eps and epsinf correspond to the static and dynamic dielectric constant of 2-pyrrolidone, respectively, and the value of epsinf can be approximated as the square of the refractive index ( $n_{20/D}=1.487(\text{lit.})$ ). See the Table S1. for solvent parameter settings.

**Table S1.** 2-Pyrrolidone SMD model parameterisation

| 2-Pyrrolidone SMD Model Custom Parameters |                     |
|-------------------------------------------|---------------------|
| eps                                       | 28.173 <sup>1</sup> |
| epsinf                                    | 2.211169            |

### 2. Resonance Correction Factor Setting in Shermo Programs

Geometry optimization and frequency calculation were performed at the B3LYP/6-311G\*\* level, and the corresponding thermodynamic correction amounts were obtained. The resonance correction factors<sup>2</sup> at this level were defined within the Shermo program as follows.

sclZPE= 0.9888 //Frequency scale factor for ZPE

sclheat= 1.0062 //Frequency scale factor for U(T)-U(0) (the same as that for H(T)-H(0))  
 sclS= 1.0104 //Frequency scale factor for S(T)

### 3. XYZ Coordinates of the Computed Structures

| Compound                                                                          | XYZ Coordinates       |             |             |             |
|-----------------------------------------------------------------------------------|-----------------------|-------------|-------------|-------------|
| 2P                                                                                | 0 1                   |             |             |             |
| 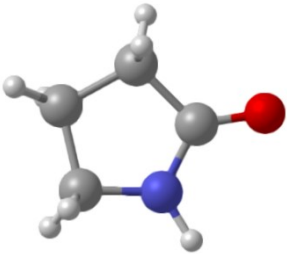 | C                     | -1.32829400 | -0.81380400 | 0.12416100  |
|                                                                                   | C                     | 0.89092000  | -0.00211200 | -0.00510500 |
|                                                                                   | C                     | -0.00768500 | 1.21727700  | 0.14135500  |
|                                                                                   | C                     | -1.41337600 | 0.69248200  | -0.18826000 |
|                                                                                   | H                     | -1.93346500 | -1.42317700 | -0.54914200 |
|                                                                                   | H                     | -1.63362100 | -1.03627500 | 1.15278500  |
|                                                                                   | H                     | 0.07235700  | 1.56444400  | 1.17800300  |
|                                                                                   | H                     | 0.33488600  | 2.02862900  | -0.50290700 |
|                                                                                   | H                     | -2.20441300 | 1.18353100  | 0.37969700  |
|                                                                                   | H                     | -1.62356800 | 0.83425300  | -1.25155400 |
|                                                                                   | N                     | 0.09581100  | -1.09141200 | -0.06036600 |
|                                                                                   | O                     | 2.12290100  | -0.00628600 | -0.04736700 |
|                                                                                   | H                     | 0.48455400  | -2.02428900 | -0.03829100 |
|                                                                                   | E = -286.6343098 a.u. |             |             |             |

| Compound                                                                            | XYZ Coordinates |            |            |             |
|-------------------------------------------------------------------------------------|-----------------|------------|------------|-------------|
| C <sub>2</sub> H <sub>2</sub>                                                       | 0 1             |            |            |             |
| 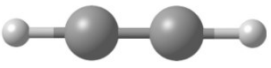 | C               | 0.00000000 | 0.00000000 | 0.60034500  |
|                                                                                     | C               | 0.00000000 | 0.00000000 | -0.60034500 |
|                                                                                     | H               | 0.00000000 | 0.00000000 | 1.66881200  |
|                                                                                     | H               | 0.00000000 | 0.00000000 | -1.66881200 |
| E = -77.3268891 a.u.                                                                |                 |            |            |             |

| Compound                                                                            | XYZ Coordinates |             |             |            |
|-------------------------------------------------------------------------------------|-----------------|-------------|-------------|------------|
| KOH                                                                                 | 0 1             |             |             |            |
| 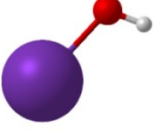 | K               | 0.03199300  | -0.77785200 | 0.00000000 |
|                                                                                     | O               | 0.03199300  | 1.60179800  | 0.00000000 |
|                                                                                     | H               | -0.86382000 | 1.96481500  | 0.00000000 |
| E = -675.7955274 a.u.                                                               |                 |             |             |            |

| Compound                                                                          | XYZ Coordinates |             |             |             |
|-----------------------------------------------------------------------------------|-----------------|-------------|-------------|-------------|
| NVP                                                                               | 0 1             |             |             |             |
| 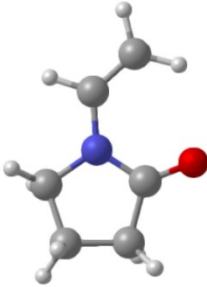 | C               | -0.85301600 | -1.39429800 | 0.13791500  |
|                                                                                   | C               | -0.18041500 | 0.87081800  | 0.01393900  |
|                                                                                   | C               | -1.69277200 | 0.86347100  | 0.13277900  |
|                                                                                   | C               | -2.09319000 | -0.57053100 | -0.23098900 |
|                                                                                   | H               | -0.69264700 | -2.24768000 | -0.52221700 |
|                                                                                   | H               | -0.89354800 | -1.75916100 | 1.16963700  |
|                                                                                   | H               | -1.94538600 | 1.11115700  | 1.17076200  |
|                                                                                   | H               | -2.12974400 | 1.63424500  | -0.50389200 |
|                                                                                   | H               | -2.98370600 | -0.91878800 | 0.29325800  |
|                                                                                   | H               | -2.28067800 | -0.64519600 | -1.30522100 |
|                                                                                   | N               | 0.25554100  | -0.42935000 | -0.00278900 |
|                                                                                   | O               | 0.53836200  | 1.86472900  | -0.03638900 |
|                                                                                   | C               | 2.70248600  | -0.13647900 | -0.03571200 |
|                                                                                   | C               | 1.58554800  | -0.87038200 | -0.00332000 |
|                                                                                   | H               | 2.70880400  | 0.94305000  | -0.06285900 |
|                                                                                   | H               | 1.65273300  | -1.95359600 | 0.02118600  |
| H                                                                                 | 3.65664700      | -0.65200300 | -0.03769200 |             |
| E = -364.0191048 a.u.                                                             |                 |             |             |             |

| Compound                                                                            | XYZ Coordinates |             |             |             |
|-------------------------------------------------------------------------------------|-----------------|-------------|-------------|-------------|
| 2P • • • KOH                                                                        | 0 1             |             |             |             |
| 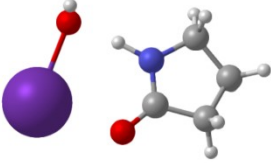 | K               | -2.68842100 | -0.44877500 | -0.07472100 |
|                                                                                     | O               | -1.67958000 | 1.83553300  | 0.01513600  |
|                                                                                     | H               | -1.71527800 | 2.16101200  | 0.92493800  |
|                                                                                     | C               | 2.03198300  | 1.25479800  | 0.03766600  |
|                                                                                     | C               | 0.72841800  | -0.68444900 | 0.04899600  |
|                                                                                     | C               | 2.17101500  | -1.15343300 | 0.17859400  |
|                                                                                     | C               | 2.98880600  | 0.07773500  | -0.23748800 |
|                                                                                     | H               | 2.13889300  | 2.06673800  | -0.68523800 |
|                                                                                     | H               | 2.18638300  | 1.67822000  | 1.03791700  |
|                                                                                     | H               | 2.34164300  | -1.43177000 | 1.22553900  |
|                                                                                     | H               | 2.34951600  | -2.04287800 | -0.42862800 |
|                                                                                     | H               | 3.93297100  | 0.17739300  | 0.30036600  |
|                                                                                     | H               | 3.21455100  | 0.03020300  | -1.30641700 |
|                                                                                     | N               | 0.70564500  | 0.64537500  | -0.05794800 |
|                                                                                     | O               | -0.27143500 | -1.43430300 | 0.06433300  |
|                                                                                     | H               | -0.22140100 | 1.19243500  | -0.04550200 |
| E = -962.4558781 a.u.                                                               |                 |             |             |             |

| Compound                                                                          | XYZ Coordinates |             |             |             |
|-----------------------------------------------------------------------------------|-----------------|-------------|-------------|-------------|
| 2P+KOH (TS)                                                                       | 0 1             |             |             |             |
| 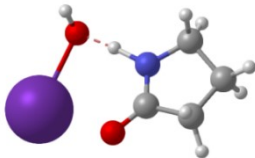 | K               | -2.67860000 | -0.43256200 | -0.08096800 |
|                                                                                   | O               | -1.53708300 | 1.83874300  | 0.01894100  |
|                                                                                   | H               | -1.61170300 | 2.23778500  | 0.89507400  |
|                                                                                   | C               | 2.01869900  | 1.22589300  | 0.03374000  |
|                                                                                   | C               | 0.69830600  | -0.66870800 | 0.05760800  |
|                                                                                   | C               | 2.13497900  | -1.17329700 | 0.17643700  |
|                                                                                   | C               | 2.96656800  | 0.04188500  | -0.25115300 |
|                                                                                   | H               | 2.13693400  | 2.04213800  | -0.68481200 |
|                                                                                   | H               | 2.19685200  | 1.64805200  | 1.03257800  |
|                                                                                   | H               | 2.31439800  | -1.45427500 | 1.22173300  |
|                                                                                   | H               | 2.28974000  | -2.06770200 | -0.43121100 |
|                                                                                   | H               | 3.91999300  | 0.13200100  | 0.27371600  |
|                                                                                   | H               | 3.17888600  | -0.01050600 | -1.32326500 |
|                                                                                   | N               | 0.67324300  | 0.65268900  | -0.04445100 |
|                                                                                   | O               | -0.30730800 | -1.42950900 | 0.07889800  |
|                                                                                   | H               | -0.40058200 | 1.29385100  | -0.01677500 |
| E = -962.4557379a.u.                                                              |                 |             |             |             |

| Compound                                                                            | XYZ Coordinates |             |             |             |
|-------------------------------------------------------------------------------------|-----------------|-------------|-------------|-------------|
| 2PK+H2O                                                                             | 0 1             |             |             |             |
| 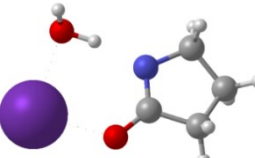 | K               | -2.66204900 | -0.52135900 | -0.13759000 |
|                                                                                     | O               | -1.70826100 | 1.88920900  | 0.07910600  |
|                                                                                     | H               | -1.79670100 | 2.33709000  | 0.92884300  |
|                                                                                     | C               | 2.08582000  | 1.22006500  | -0.01858300 |
|                                                                                     | C               | 0.72755500  | -0.60621300 | 0.10585900  |
|                                                                                     | C               | 2.15417200  | -1.16306100 | 0.19842000  |
|                                                                                     | C               | 3.00322900  | 0.00882400  | -0.30023800 |
|                                                                                     | H               | 2.20984500  | 2.01687900  | -0.76033600 |
|                                                                                     | H               | 2.31941100  | 1.66789600  | 0.95980500  |
|                                                                                     | H               | 2.36475700  | -1.41388300 | 1.24634000  |
|                                                                                     | H               | 2.25966300  | -2.08384100 | -0.38117700 |
|                                                                                     | H               | 3.98020100  | 0.09271700  | 0.18298700  |
|                                                                                     | H               | 3.17238300  | -0.08466900 | -1.37808600 |
|                                                                                     | N               | 0.71294300  | 0.70301800  | -0.02791100 |
|                                                                                     | O               | -0.29041600 | -1.37027900 | 0.17870500  |
|                                                                                     | H               | -0.75645200 | 1.54336800  | 0.03597700  |
| E = -962.4594199 a.u.                                                               |                 |             |             |             |

| Compound                                                                          | XYZ Coordinates       |             |             |             |
|-----------------------------------------------------------------------------------|-----------------------|-------------|-------------|-------------|
| 2PK                                                                               | 0 1                   |             |             |             |
| 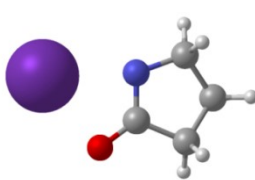 | C                     | -1.48301400 | -1.34731800 | 0.12955900  |
|                                                                                   | C                     | -0.33969600 | 0.61110400  | 0.02021400  |
|                                                                                   | C                     | -1.81407100 | 1.02482700  | 0.11994900  |
|                                                                                   | C                     | -2.54258200 | -0.27653200 | -0.22471600 |
|                                                                                   | H                     | -1.54780900 | -2.22578100 | -0.52318900 |
|                                                                                   | H                     | -1.63297100 | -1.71609300 | 1.15700000  |
|                                                                                   | H                     | -2.01702000 | 1.35860200  | 1.14603600  |
|                                                                                   | H                     | -2.03797400 | 1.86495800  | -0.54288000 |
|                                                                                   | H                     | -3.48702400 | -0.41705200 | 0.30790400  |
|                                                                                   | H                     | -2.75800300 | -0.31006600 | -1.29796600 |
|                                                                                   | N                     | -0.17523600 | -0.69451400 | 0.00812900  |
|                                                                                   | O                     | 0.60190900  | 1.47629200  | -0.01862200 |
|                                                                                   | K                     | 2.47201900  | -0.29346300 | -0.02236100 |
|                                                                                   | E = -886.0061721 a.u. |             |             |             |

| Compound                                                                          | XYZ Coordinates |            |             |             |
|-----------------------------------------------------------------------------------|-----------------|------------|-------------|-------------|
| H2O                                                                               | 0 1             |            |             |             |
| 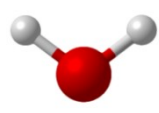 | O               | 0.00000000 | 0.00000000  | 0.11725200  |
|                                                                                   | H               | 0.00000000 | 0.76524400  | -0.46900900 |
|                                                                                   | H               | 0.00000000 | -0.76524400 | -0.46900900 |
| E = -76.4373134 a.u.                                                              |                 |            |             |             |

| Compound                                                                            | XYZ Coordinates       |             |             |             |
|-------------------------------------------------------------------------------------|-----------------------|-------------|-------------|-------------|
| 2PK+C <sub>2</sub> H <sub>2</sub> (TS1)                                             | 0 1                   |             |             |             |
| 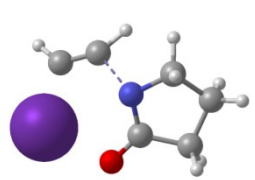 | C                     | 1.62783900  | 0.83612100  | 0.99367000  |
|                                                                                     | C                     | 0.64226700  | -0.70398800 | -0.38788000 |
|                                                                                     | C                     | 2.14069100  | -1.00579300 | -0.44939000 |
|                                                                                     | C                     | 2.76834700  | 0.26911000  | 0.12123900  |
|                                                                                     | H                     | 1.63638000  | 1.93194100  | 1.03586200  |
|                                                                                     | H                     | 1.70925800  | 0.48355800  | 2.03009700  |
|                                                                                     | H                     | 2.34684200  | -1.88586600 | 0.17232200  |
|                                                                                     | H                     | 2.44368200  | -1.25210700 | -1.47024300 |
|                                                                                     | H                     | 3.68731500  | 0.09745200  | 0.68638400  |
|                                                                                     | H                     | 2.99840900  | 0.96848900  | -0.68871900 |
|                                                                                     | N                     | 0.37695600  | 0.34974700  | 0.40048800  |
|                                                                                     | O                     | -0.22533200 | -1.39275900 | -0.98101800 |
|                                                                                     | K                     | -2.19287100 | -0.72442200 | 0.58554700  |
|                                                                                     | C                     | -1.80532800 | 1.64716100  | -0.88354000 |
|                                                                                     | C                     | -0.65231400 | 1.84263600  | -0.43498900 |
|                                                                                     | H                     | -2.50396200 | 2.31054100  | -1.37564700 |
|                                                                                     | H                     | 0.18158300  | 2.49236600  | -0.22537600 |
|                                                                                     | E = -963.2995319 a.u. |             |             |             |

| Compound                                                                          | XYZ Coordinates |             |             |             |
|-----------------------------------------------------------------------------------|-----------------|-------------|-------------|-------------|
| 2PK+ C <sub>2</sub> H <sub>2</sub> (TS2)                                          | 0 1             |             |             |             |
| 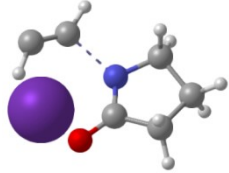 | C               | 1.68939000  | 1.01041000  | -0.77893100 |
|                                                                                   | C               | 0.62755200  | -0.60782000 | 0.46338100  |
|                                                                                   | C               | 2.11884800  | -0.86592200 | 0.65673400  |
|                                                                                   | C               | 2.74420300  | -0.08115700 | -0.50113400 |
|                                                                                   | H               | 1.65628300  | 1.30395400  | -1.83238700 |
|                                                                                   | H               | 1.90329400  | 1.91743400  | -0.19662700 |
|                                                                                   | H               | 2.41016200  | -0.46202100 | 1.63515900  |
|                                                                                   | H               | 2.34424600  | -1.93449900 | 0.66266800  |
|                                                                                   | H               | 3.72799900  | 0.33561200  | -0.27419800 |
|                                                                                   | H               | 2.84809100  | -0.72893300 | -1.37697800 |
|                                                                                   | N               | 0.40726500  | 0.42665400  | -0.35426900 |
|                                                                                   | O               | -0.28237100 | -1.28381300 | 1.01322300  |
|                                                                                   | K               | -2.15131800 | -0.73410700 | -0.70655500 |
|                                                                                   | C               | -1.67684900 | 1.66593400  | 1.21387900  |
|                                                                                   | C               | -0.87133000 | 1.78835000  | 0.24381100  |
|                                                                                   | H               | -1.82880300 | 0.83764100  | 1.89630300  |
|                                                                                   | H               | -0.56900800 | 2.50399400  | -0.50175200 |
| E = -963.3038542 a.u.                                                             |                 |             |             |             |

| Compound                                                                            | XYZ Coordinates |             |             |             |
|-------------------------------------------------------------------------------------|-----------------|-------------|-------------|-------------|
| NVPK1                                                                               | 0 1             |             |             |             |
| 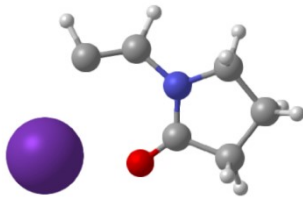 | C               | 2.27326300  | 0.89270300  | 0.28170500  |
|                                                                                     | C               | 0.58463300  | -0.67217600 | -0.15759000 |
|                                                                                     | C               | 1.84850100  | -1.46494000 | 0.13560500  |
|                                                                                     | C               | 2.97572200  | -0.43893300 | -0.01050800 |
|                                                                                     | H               | 2.66782200  | 1.72422900  | -0.30629400 |
|                                                                                     | H               | 2.33886200  | 1.17154600  | 1.34023300  |
|                                                                                     | H               | 1.77233300  | -1.85226600 | 1.15926400  |
|                                                                                     | H               | 1.92417300  | -2.32429000 | -0.53338500 |
|                                                                                     | H               | 3.81820300  | -0.61525000 | 0.65984600  |
|                                                                                     | H               | 3.35383800  | -0.44186900 | -1.03641200 |
|                                                                                     | N               | 0.86487200  | 0.64655100  | -0.07588800 |
|                                                                                     | O               | -0.51305400 | -1.19433300 | -0.41578900 |
|                                                                                     | K               | -2.87900100 | -0.50633300 | 0.13996300  |
|                                                                                     | C               | -1.33380600 | 1.81793700  | 0.06812500  |
|                                                                                     | C               | -0.02046800 | 1.78358700  | -0.21125800 |
|                                                                                     | H               | -1.67279800 | 2.84762100  | -0.15650400 |
|                                                                                     | H               | 0.58183600  | 2.63033200  | -0.56498600 |
| E = -963.3425254 a.u.                                                               |                 |             |             |             |

| Compound                                                                          | XYZ Coordinates |             |             |             |
|-----------------------------------------------------------------------------------|-----------------|-------------|-------------|-------------|
| NVPK2                                                                             | 0 1             |             |             |             |
| 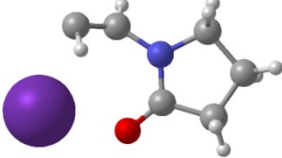 | C               | 2.18527200  | 1.04792700  | -0.07281400 |
|                                                                                   | C               | 0.63835900  | -0.71505500 | 0.08255000  |
|                                                                                   | C               | 2.01150600  | -1.33663000 | 0.26986500  |
|                                                                                   | C               | 2.97855700  | -0.25910500 | -0.23951700 |
|                                                                                   | H               | 2.36520200  | 1.76563400  | -0.87711500 |
|                                                                                   | H               | 2.40127900  | 1.54964600  | 0.87768100  |
|                                                                                   | H               | 2.14524600  | -1.54273000 | 1.33870500  |
|                                                                                   | H               | 2.07782500  | -2.28953400 | -0.25800700 |
|                                                                                   | H               | 3.92594000  | -0.23596200 | 0.30074900  |
|                                                                                   | H               | 3.19807200  | -0.42617000 | -1.29725900 |
|                                                                                   | N               | 0.78163800  | 0.61217500  | -0.09064200 |
|                                                                                   | O               | -0.43667700 | -1.34295000 | 0.09666700  |
|                                                                                   | K               | -2.83511000 | -0.42343400 | -0.17074100 |
|                                                                                   | C               | -1.31232100 | 1.77430000  | 0.63803700  |
|                                                                                   | C               | -0.31144500 | 1.56414100  | -0.23249300 |
|                                                                                   | H               | -1.15457500 | 1.12161700  | 1.52411100  |
|                                                                                   | H               | -0.20951600 | 2.10765300  | -1.17739300 |
| E = -963.3387505 a.u.                                                             |                 |             |             |             |

| Compound                                                                            | XYZ Coordinates |             |             |             |
|-------------------------------------------------------------------------------------|-----------------|-------------|-------------|-------------|
| NVPK2                                                                               | 0 1             |             |             |             |
| 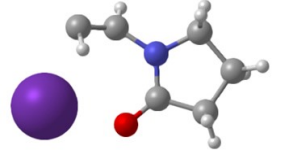 | C               | 2.18527200  | 1.04792700  | -0.07281400 |
|                                                                                     | C               | 0.63835900  | -0.71505500 | 0.08255000  |
|                                                                                     | C               | 2.01150600  | -1.33663000 | 0.26986500  |
|                                                                                     | C               | 2.97855700  | -0.25910500 | -0.23951700 |
|                                                                                     | H               | 2.36520200  | 1.76563400  | -0.87711500 |
|                                                                                     | H               | 2.40127900  | 1.54964600  | 0.87768100  |
|                                                                                     | H               | 2.14524600  | -1.54273000 | 1.33870500  |
|                                                                                     | H               | 2.07782500  | -2.28953400 | -0.25800700 |
|                                                                                     | H               | 3.92594000  | -0.23596200 | 0.30074900  |
|                                                                                     | H               | 3.19807200  | -0.42617000 | -1.29725900 |
|                                                                                     | N               | 0.78163800  | 0.61217500  | -0.09064200 |
|                                                                                     | O               | -0.43667700 | -1.34295000 | 0.09666700  |
|                                                                                     | K               | -2.83511000 | -0.42343400 | -0.17074100 |
|                                                                                     | C               | -1.31232100 | 1.77430000  | 0.63803700  |
|                                                                                     | C               | -0.31144500 | 1.56414100  | -0.23249300 |
|                                                                                     | H               | -1.15457500 | 1.12161700  | 1.52411100  |
|                                                                                     | H               | -0.20951600 | 2.10765300  | -1.17739300 |
| E = -963.3387505 a.u.                                                               |                 |             |             |             |

| Compound                                                                                            | XYZ Coordinates        |             |             |             |
|-----------------------------------------------------------------------------------------------------|------------------------|-------------|-------------|-------------|
| NVPK1 • • • 2P<br>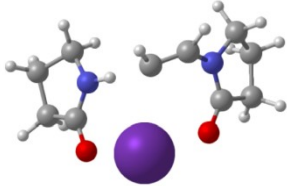 | 0 1                    |             |             |             |
|                                                                                                     | C                      | -3.15458400 | -1.58842600 | 0.54538500  |
|                                                                                                     | C                      | -2.31673200 | 0.28521500  | -0.59217400 |
|                                                                                                     | C                      | -3.21210600 | -0.45304000 | -1.57431600 |
|                                                                                                     | C                      | -3.39273700 | -1.84080800 | -0.95022800 |
|                                                                                                     | H                      | -2.67304400 | -2.42827200 | 1.04976600  |
|                                                                                                     | H                      | -4.08669600 | -1.36100800 | 1.07745200  |
|                                                                                                     | H                      | -4.15663900 | 0.10021000  | -1.63734300 |
|                                                                                                     | H                      | -2.76625300 | -0.45852700 | -2.57050800 |
|                                                                                                     | H                      | -4.37232600 | -2.28044900 | -1.14151300 |
|                                                                                                     | H                      | -2.63176400 | -2.52503300 | -1.33378800 |
|                                                                                                     | N                      | -2.26895700 | -0.41145400 | 0.56510900  |
|                                                                                                     | O                      | -1.77077700 | 1.37355300  | -0.83004000 |
|                                                                                                     | K                      | 0.27727900  | 2.57313900  | 0.13192900  |
|                                                                                                     | C                      | -0.42105100 | 0.44286900  | 1.97167800  |
|                                                                                                     | C                      | -1.67823300 | 0.00123500  | 1.81977800  |
|                                                                                                     | H                      | -0.27304800 | 0.66817000  | 3.04411400  |
|                                                                                                     | H                      | -2.41389000 | -0.14421200 | 2.62091800  |
|                                                                                                     | C                      | 2.50102100  | -1.92607500 | 0.61124300  |
|                                                                                                     | C                      | 2.68291300  | 0.16966500  | -0.42425300 |
|                                                                                                     | C                      | 3.78240300  | -0.69094300 | -1.02853000 |
|                                                                                                     | C                      | 3.88949300  | -1.87754100 | -0.05831400 |
|                                                                                                     | H                      | 2.54510900  | -2.23748100 | 1.65685500  |
|                                                                                                     | H                      | 1.82113200  | -2.60669600 | 0.08518900  |
|                                                                                                     | H                      | 3.45185000  | -0.99923200 | -2.02730700 |
|                                                                                                     | H                      | 4.70338200  | -0.11781700 | -1.14695600 |
|                                                                                                     | H                      | 4.14324000  | -2.81830400 | -0.54822300 |
|                                                                                                     | H                      | 4.65265700  | -1.67110600 | 0.69654100  |
|                                                                                                     | N                      | 2.02979200  | -0.54527600 | 0.49816300  |
|                                                                                                     | O                      | 2.42274100  | 1.34282800  | -0.75461700 |
|                                                                                                     | H                      | 1.16410000  | -0.17672900 | 0.98091300  |
|                                                                                                     | E = -1249.9971186 a.u. |             |             |             |



| Compound                                                                          | XYZ Coordinates |             |             |             |
|-----------------------------------------------------------------------------------|-----------------|-------------|-------------|-------------|
| NVPK2 • • • 2P                                                                    | 0 1             |             |             |             |
| 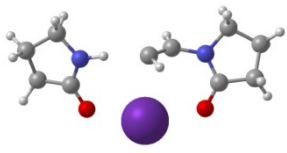 | C               | -3.55125400 | -1.81077300 | -0.23719700 |
|                                                                                   | C               | -3.09698300 | 0.47439300  | 0.08578000  |
|                                                                                   | C               | -4.60867200 | 0.32800700  | 0.13603200  |
|                                                                                   | C               | -4.86890000 | -1.05474900 | -0.47651300 |
|                                                                                   | H               | -3.28372800 | -2.47871000 | -1.05986600 |
|                                                                                   | H               | -3.57220700 | -2.40586300 | 0.68334100  |
|                                                                                   | H               | -4.91724900 | 0.38086100  | 1.18705700  |
|                                                                                   | H               | -5.09267500 | 1.15330900  | -0.38900100 |
|                                                                                   | H               | -5.72346300 | -1.57053000 | -0.03639800 |
|                                                                                   | H               | -5.05036000 | -0.95822800 | -1.55014400 |
|                                                                                   | N               | -2.55056300 | -0.74181900 | -0.10914800 |
|                                                                                   | O               | -2.47963400 | 1.54602100  | 0.21290000  |
|                                                                                   | K               | 0.09820000  | 2.00919800  | 0.09841200  |
|                                                                                   | C               | -0.23937600 | -0.81323900 | 0.84467900  |
|                                                                                   | C               | -1.12655800 | -1.03345300 | -0.13715200 |
|                                                                                   | H               | -0.75274900 | -0.38408000 | 1.72971400  |
|                                                                                   | H               | -0.85374900 | -1.48275700 | -1.09773200 |
|                                                                                   | C               | 3.68388100  | -1.82460200 | 0.26691500  |
|                                                                                   | C               | 3.23355200  | 0.42429600  | -0.21028900 |
|                                                                                   | C               | 4.69289800  | 0.20297100  | -0.58097900 |
|                                                                                   | C               | 5.04652600  | -1.12055100 | 0.11340300  |
|                                                                                   | H               | 3.60870600  | -2.41107500 | 1.18510600  |
|                                                                                   | H               | 3.47506500  | -2.49467900 | -0.57561800 |
|                                                                                   | H               | 4.75467100  | 0.12910200  | -1.67329700 |
|                                                                                   | H               | 5.30593800  | 1.05313700  | -0.27603000 |
| H                                                                                 | 5.76383500      | -1.72626500 | -0.44236600 |             |
| H                                                                                 | 5.46964700      | -0.92032300 | 1.10154300  |             |
| N                                                                                 | 2.73316800      | -0.71284600 | 0.28184500  |             |
| O                                                                                 | 2.60800800      | 1.49238600  | -0.36418500 |             |
| H                                                                                 | 1.70661800      | -0.81705700 | 0.51719900  |             |
| E = -1249.9944723 a.u.                                                            |                 |             |             |             |

| Compound                                                                                               | XYZ Coordinates        |             |             |             |
|--------------------------------------------------------------------------------------------------------|------------------------|-------------|-------------|-------------|
| NVPK1+2P (TS)<br><br>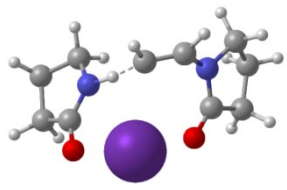 | 0 1                    |             |             |             |
|                                                                                                        | C                      | -3.55125400 | -1.81077300 | -0.23719700 |
|                                                                                                        | C                      | -3.09698300 | 0.47439300  | 0.08578000  |
|                                                                                                        | C                      | -4.60867200 | 0.32800700  | 0.13603200  |
|                                                                                                        | C                      | -4.86890000 | -1.05474900 | -0.47651300 |
|                                                                                                        | H                      | -3.28372800 | -2.47871000 | -1.05986600 |
|                                                                                                        | H                      | -3.57220700 | -2.40586300 | 0.68334100  |
|                                                                                                        | H                      | -4.91724900 | 0.38086100  | 1.18705700  |
|                                                                                                        | H                      | -5.09267500 | 1.15330900  | -0.38900100 |
|                                                                                                        | H                      | -5.72346300 | -1.57053000 | -0.03639800 |
|                                                                                                        | H                      | -5.05036000 | -0.95822800 | -1.55014400 |
|                                                                                                        | N                      | -2.55056300 | -0.74181900 | -0.10914800 |
|                                                                                                        | O                      | -2.47963400 | 1.54602100  | 0.21290000  |
|                                                                                                        | K                      | 0.09820000  | 2.00919800  | 0.09841200  |
|                                                                                                        | C                      | -0.23937600 | -0.81323900 | 0.84467900  |
|                                                                                                        | C                      | -1.12655800 | -1.03345300 | -0.13715200 |
|                                                                                                        | H                      | -0.75274900 | -0.38408000 | 1.72971400  |
|                                                                                                        | H                      | -0.85374900 | -1.48275700 | -1.09773200 |
|                                                                                                        | C                      | 3.68388100  | -1.82460200 | 0.26691500  |
|                                                                                                        | C                      | 3.23355200  | 0.42429600  | -0.21028900 |
|                                                                                                        | C                      | 4.69289800  | 0.20297100  | -0.58097900 |
|                                                                                                        | C                      | 5.04652600  | -1.12055100 | 0.11340300  |
|                                                                                                        | H                      | 3.60870600  | -2.41107500 | 1.18510600  |
|                                                                                                        | H                      | 3.47506500  | -2.49467900 | -0.57561800 |
|                                                                                                        | H                      | 4.75467100  | 0.12910200  | -1.67329700 |
|                                                                                                        | H                      | 5.30593800  | 1.05313700  | -0.27603000 |
|                                                                                                        | H                      | 5.76383500  | -1.72626500 | -0.44236600 |
|                                                                                                        | H                      | 5.46964700  | -0.92032300 | 1.10154300  |
|                                                                                                        | N                      | 2.73316800  | -0.71284600 | 0.28184500  |
|                                                                                                        | O                      | 2.60800800  | 1.49238600  | -0.36418500 |
|                                                                                                        | H                      | 1.70661800  | -0.81705700 | 0.51719900  |
|                                                                                                        | E = -1249.9937188 a.u. |             |             |             |

| Compound                                                                          | XYZ Coordinates       |             |             |             |
|-----------------------------------------------------------------------------------|-----------------------|-------------|-------------|-------------|
| 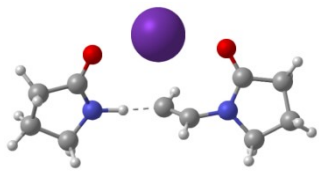 | 0 1                   |             |             |             |
|                                                                                   | C                     | -3.55125400 | -1.81077300 | -0.23719700 |
|                                                                                   | C                     | -3.09698300 | 0.47439300  | 0.08578000  |
|                                                                                   | C                     | -4.60867200 | 0.32800700  | 0.13603200  |
|                                                                                   | C                     | -4.86890000 | -1.05474900 | -0.47651300 |
|                                                                                   | H                     | -3.28372800 | -2.47871000 | -1.05986600 |
|                                                                                   | H                     | -3.57220700 | -2.40586300 | 0.68334100  |
|                                                                                   | H                     | -4.91724900 | 0.38086100  | 1.18705700  |
|                                                                                   | H                     | -5.09267500 | 1.15330900  | -0.38900100 |
|                                                                                   | H                     | -5.72346300 | -1.57053000 | -0.03639800 |
|                                                                                   | H                     | -5.05036000 | -0.95822800 | -1.55014400 |
|                                                                                   | N                     | -2.55056300 | -0.74181900 | -0.10914800 |
|                                                                                   | O                     | -2.47963400 | 1.54602100  | 0.21290000  |
|                                                                                   | K                     | 0.09820000  | 2.00919800  | 0.09841200  |
|                                                                                   | C                     | -0.23937600 | -0.81323900 | 0.84467900  |
|                                                                                   | C                     | -1.12655800 | -1.03345300 | -0.13715200 |
|                                                                                   | H                     | -0.75274900 | -0.38408000 | 1.72971400  |
|                                                                                   | H                     | -0.85374900 | -1.48275700 | -1.09773200 |
|                                                                                   | C                     | 3.68388100  | -1.82460200 | 0.26691500  |
|                                                                                   | C                     | 3.23355200  | 0.42429600  | -0.21028900 |
|                                                                                   | C                     | 4.69289800  | 0.20297100  | -0.58097900 |
|                                                                                   | C                     | 5.04652600  | -1.12055100 | 0.11340300  |
|                                                                                   | H                     | 3.60870600  | -2.41107500 | 1.18510600  |
|                                                                                   | H                     | 3.47506500  | -2.49467900 | -0.57561800 |
|                                                                                   | H                     | 4.75467100  | 0.12910200  | -1.67329700 |
|                                                                                   | H                     | 5.30593800  | 1.05313700  | -0.27603000 |
|                                                                                   | H                     | 5.76383500  | -1.72626500 | -0.44236600 |
|                                                                                   | H                     | 5.46964700  | -0.92032300 | 1.10154300  |
|                                                                                   | N                     | 2.73316800  | -0.71284600 | 0.28184500  |
|                                                                                   | O                     | 2.60800800  | 1.49238600  | -0.36418500 |
|                                                                                   | H                     | 1.70661800  | -0.81705700 | 0.51719900  |
|                                                                                   | E = -1249.996249 a.u. |             |             |             |

| Compound                                                                          | XYZ Coordinates |             |             |             |
|-----------------------------------------------------------------------------------|-----------------|-------------|-------------|-------------|
| NVP • • • 2PK(1)                                                                  | 0 1             |             |             |             |
| 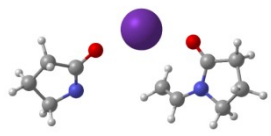 | C               | 3.87042500  | 1.73797700  | -0.42090900 |
|                                                                                   | C               | 3.14174500  | -0.45429500 | 0.08630800  |
|                                                                                   | C               | 4.52055300  | -0.58486400 | -0.52584400 |
|                                                                                   | C               | 4.75740800  | 0.76638900  | -1.21208600 |
|                                                                                   | H               | 3.42010300  | 2.51503700  | -1.04097900 |
|                                                                                   | H               | 4.41120000  | 2.22327500  | 0.39757300  |
|                                                                                   | H               | 5.23061900  | -0.76395800 | 0.29037500  |
|                                                                                   | H               | 4.56159600  | -1.44740000 | -1.19246500 |
|                                                                                   | H               | 5.80281700  | 1.07552700  | -1.20771300 |
|                                                                                   | H               | 4.42124700  | 0.72071400  | -2.25085900 |
|                                                                                   | N               | 2.81649600  | 0.86903400  | 0.13823500  |
|                                                                                   | O               | 2.42717400  | -1.38369600 | 0.47126300  |
|                                                                                   | K               | -0.10369200 | -2.00376300 | 0.27787800  |
|                                                                                   | C               | 0.88093500  | 0.92462500  | 1.64084900  |
|                                                                                   | C               | 1.63167900  | 1.42165300  | 0.65542400  |
|                                                                                   | H               | 1.15541000  | 0.04171900  | 2.20531700  |
|                                                                                   | H               | 1.35137200  | 2.34742700  | 0.16074900  |
|                                                                                   | C               | -4.57631000 | 1.65106000  | 0.11315400  |
|                                                                                   | C               | -3.27668200 | -0.17396000 | -0.18691400 |
|                                                                                   | C               | -4.56096700 | -0.47244000 | -0.97890300 |
|                                                                                   | C               | -5.53778400 | 0.56214100  | -0.41762600 |
|                                                                                   | H               | -4.97558300 | 2.15834200  | 0.99932800  |
|                                                                                   | H               | -4.42660900 | 2.43694600  | -0.64457600 |
| H                                                                                 | -4.36233200     | -0.32114900 | -2.04860600 |             |
| H                                                                                 | -4.87523200     | -1.51284200 | -0.85543100 |             |
| H                                                                                 | -6.26026700     | 0.94334400  | -1.14515100 |             |
| H                                                                                 | -6.10324200     | 0.12896200  | 0.41475700  |             |
| N                                                                                 | -3.30404800     | 0.98689700  | 0.41654500  |             |
| O                                                                                 | -2.30721400     | -1.01279300 | -0.18163200 |             |
| H                                                                                 | -0.03379000     | 1.43624300  | 1.91677300  |             |
| E = -1250.0346495 a.u.                                                            |                 |             |             |             |

| Compound                                                                          | XYZ Coordinates |             |             |             |
|-----------------------------------------------------------------------------------|-----------------|-------------|-------------|-------------|
| NVP • • • 2PK(2)                                                                  | 0 1             |             |             |             |
| 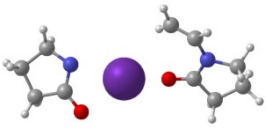 | C               | -3.55125400 | -1.81077300 | -0.23719700 |
|                                                                                   | C               | -3.09698300 | 0.47439300  | 0.08578000  |
|                                                                                   | C               | -4.60867200 | 0.32800700  | 0.13603200  |
|                                                                                   | C               | -4.86890000 | -1.05474900 | -0.47651300 |
|                                                                                   | H               | -3.28372800 | -2.47871000 | -1.05986600 |
|                                                                                   | H               | -3.57220700 | -2.40586300 | 0.68334100  |
|                                                                                   | H               | -4.91724900 | 0.38086100  | 1.18705700  |
|                                                                                   | H               | -5.09267500 | 1.15330900  | -0.38900100 |
|                                                                                   | H               | -5.72346300 | -1.57053000 | -0.03639800 |
|                                                                                   | H               | -5.05036000 | -0.95822800 | -1.55014400 |
|                                                                                   | N               | -2.55056300 | -0.74181900 | -0.10914800 |
|                                                                                   | O               | -2.47963400 | 1.54602100  | 0.21290000  |
|                                                                                   | K               | 0.09820000  | 2.00919800  | 0.09841200  |
|                                                                                   | C               | -0.23937600 | -0.81323900 | 0.84467900  |
|                                                                                   | C               | -1.12655800 | -1.03345300 | -0.13715200 |
|                                                                                   | H               | -0.75274900 | -0.38408000 | 1.72971400  |
|                                                                                   | H               | -0.85374900 | -1.48275700 | -1.09773200 |
|                                                                                   | C               | 3.68388100  | -1.82460200 | 0.26691500  |
|                                                                                   | C               | 3.23355200  | 0.42429600  | -0.21028900 |
|                                                                                   | C               | 4.69289800  | 0.20297100  | -0.58097900 |
|                                                                                   | C               | 5.04652600  | -1.12055100 | 0.11340300  |
|                                                                                   | H               | 3.60870600  | -2.41107500 | 1.18510600  |
|                                                                                   | H               | 3.47506500  | -2.49467900 | -0.57561800 |
|                                                                                   | H               | 4.75467100  | 0.12910200  | -1.67329700 |
| H                                                                                 | 5.30593800      | 1.05313700  | -0.27603000 |             |
| H                                                                                 | 5.76383500      | -1.72626500 | -0.44236600 |             |
| H                                                                                 | 5.46964700      | -0.92032300 | 1.10154300  |             |
| N                                                                                 | 2.73316800      | -0.71284600 | 0.28184500  |             |
| O                                                                                 | 2.60800800      | 1.49238600  | -0.36418500 |             |
| H                                                                                 | 1.70661800      | -0.81705700 | 0.51719900  |             |
| E = -1250.0410943 a.u.                                                            |                 |             |             |             |

## ring opening process

| Compound                                                                          | XYZ Coordinates       |             |             |             |
|-----------------------------------------------------------------------------------|-----------------------|-------------|-------------|-------------|
| 2P • • • KOH                                                                      | 0 1                   |             |             |             |
| 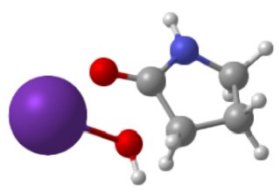 | C                     | -2.22264000 | 0.64361500  | -0.78211300 |
|                                                                                   | C                     | -0.59303900 | -0.87618500 | -0.04549900 |
|                                                                                   | C                     | -1.26968800 | -0.33541200 | 1.20208800  |
|                                                                                   | C                     | -2.56436800 | 0.30394200  | 0.67800700  |
|                                                                                   | H                     | -1.74156100 | 1.62413600  | -0.86275500 |
|                                                                                   | H                     | -3.08296500 | 0.61179600  | -1.45150800 |
|                                                                                   | H                     | -1.41079500 | -1.12005700 | 1.94725900  |
|                                                                                   | H                     | -0.59124000 | 0.41508400  | 1.62085100  |
|                                                                                   | H                     | -3.38215400 | -0.42114500 | 0.70690100  |
|                                                                                   | H                     | -2.87116900 | 1.18527600  | 1.24239300  |
|                                                                                   | N                     | -1.25276200 | -0.40303700 | -1.11762200 |
|                                                                                   | O                     | 0.41149500  | -1.60315400 | -0.07937200 |
|                                                                                   | K                     | 2.58545500  | -0.11346800 | 0.01749800  |
|                                                                                   | O                     | 1.15781000  | 1.92829800  | -0.02878200 |
|                                                                                   | H                     | -0.85171700 | -0.48938800 | -2.04261500 |
|                                                                                   | H                     | 0.92126400  | 2.15453000  | 0.88069000  |
|                                                                                   | E = -962.4469941 a.u. |             |             |             |

| Compound                                                                            | XYZ Coordinates      |             |             |             |
|-------------------------------------------------------------------------------------|----------------------|-------------|-------------|-------------|
| 2P+KOH (ts1)                                                                        | 0 1                  |             |             |             |
| 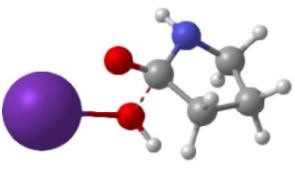 | C                    | -2.30680500 | -0.91549400 | -0.00678500 |
|                                                                                     | C                    | -0.31713300 | 0.22739400  | 0.47587300  |
|                                                                                     | C                    | -1.19836400 | 1.25631100  | -0.25443000 |
|                                                                                     | C                    | -2.51708200 | 0.51271400  | -0.56412000 |
|                                                                                     | H                    | -2.01193000 | -1.60662600 | -0.80558200 |
|                                                                                     | H                    | -3.20653700 | -1.31465300 | 0.46804000  |
|                                                                                     | H                    | -1.36085600 | 2.09259700  | 0.43310600  |
|                                                                                     | H                    | -0.69467700 | 1.65521200  | -1.13514900 |
|                                                                                     | H                    | -3.35914000 | 0.99566100  | -0.06267200 |
|                                                                                     | H                    | -2.74965500 | 0.48685600  | -1.63090500 |
|                                                                                     | N                    | -1.23360000 | -0.73989500 | 0.97377500  |
|                                                                                     | O                    | 0.68883500  | 0.55968100  | 1.18098300  |
|                                                                                     | K                    | 2.72763400  | -0.05183100 | -0.15965800 |
|                                                                                     | O                    | 0.44051100  | -0.64219900 | -0.98427600 |
|                                                                                     | H                    | -0.77205900 | -1.59867100 | 1.25303100  |
|                                                                                     | H                    | -0.03345700 | -0.37173300 | -1.77969000 |
|                                                                                     | E = -962.426424 a.u. |             |             |             |

| Compound                                                                          | XYZ Coordinates |             |             |             |
|-----------------------------------------------------------------------------------|-----------------|-------------|-------------|-------------|
| intermediate                                                                      | 0 1             |             |             |             |
| 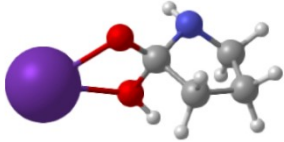 | C               | -2.39717800 | -0.80426700 | -0.25466700 |
|                                                                                   | C               | -0.26791300 | 0.01877300  | 0.37365500  |
|                                                                                   | C               | -1.14853300 | 1.27106900  | 0.09206400  |
|                                                                                   | C               | -2.54056000 | 0.73401500  | -0.31357000 |
|                                                                                   | H               | -2.18939100 | -1.21238400 | -1.25596800 |
|                                                                                   | H               | -3.30578300 | -1.29338200 | 0.10718000  |
|                                                                                   | H               | -1.19790000 | 1.84903300  | 1.01816400  |
|                                                                                   | H               | -0.68823400 | 1.90732500  | -0.66742100 |
|                                                                                   | H               | -3.30454900 | 1.06973000  | 0.39223400  |
|                                                                                   | H               | -2.85539300 | 1.06365900  | -1.30682200 |
|                                                                                   | N               | -1.28311300 | -1.00482600 | 0.67785200  |
|                                                                                   | O               | 0.71420300  | 0.11329500  | 1.23631000  |
|                                                                                   | K               | 2.78350000  | 0.02559200  | -0.17043100 |
|                                                                                   | O               | 0.39047600  | -0.36914000 | -0.99108700 |
|                                                                                   | H               | -0.86648200 | -1.92684000 | 0.58280300  |
|                                                                                   | H               | -0.20931700 | -0.18039400 | -1.72362000 |
| E = -962.4328818 a.u.                                                             |                 |             |             |             |

| Compound                                                                            | XYZ Coordinates |             |             |             |
|-------------------------------------------------------------------------------------|-----------------|-------------|-------------|-------------|
| ts2                                                                                 | 0 1             |             |             |             |
| 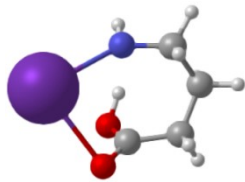 | C               | -1.44123700 | 1.56132900  | -0.33924800 |
|                                                                                     | C               | -0.22070500 | -1.21923500 | 0.02393100  |
|                                                                                     | C               | -1.63598800 | -0.97297400 | -0.43745300 |
|                                                                                     | C               | -2.30202000 | 0.33030800  | 0.02481900  |
|                                                                                     | H               | -2.03373900 | 2.46216600  | -0.08584800 |
|                                                                                     | H               | -1.35708300 | 1.57538800  | -1.44038100 |
|                                                                                     | H               | -1.62182500 | -1.02753800 | -1.52903000 |
|                                                                                     | H               | -2.21252100 | -1.83761900 | -0.08226800 |
|                                                                                     | H               | -3.29904600 | 0.38268800  | -0.43463200 |
|                                                                                     | H               | -2.46063700 | 0.30942800  | 1.11123400  |
|                                                                                     | N               | -0.11285800 | 1.53483200  | 0.25120900  |
|                                                                                     | O               | 0.63752900  | -1.71275100 | -0.68947500 |
|                                                                                     | K               | 2.22245500  | 0.50226200  | -0.15774500 |
|                                                                                     | O               | 0.06811800  | -1.05001900 | 1.35134700  |
|                                                                                     | H               | -0.20875200 | 1.91767700  | 1.19870700  |
|                                                                                     | H               | -0.28850400 | -0.16340100 | 1.57364000  |
| E = -962.3929261 a.u.                                                               |                 |             |             |             |

| Compound                                                                          | XYZ Coordinates |             |             |             |
|-----------------------------------------------------------------------------------|-----------------|-------------|-------------|-------------|
| ts2 H <sub>2</sub> O                                                              | 0 1             |             |             |             |
| 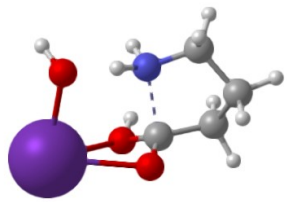 | C               | -1.95006500 | 1.43258300  | 0.10009600  |
|                                                                                   | C               | -0.57169400 | -0.86360700 | 0.00234500  |
|                                                                                   | C               | -2.09288900 | -1.01582100 | 0.02062500  |
|                                                                                   | C               | -2.64199700 | 0.25447100  | -0.62691100 |
|                                                                                   | H               | -2.56557600 | 1.77479600  | 0.93473600  |
|                                                                                   | H               | -1.79369900 | 2.28072900  | -0.56934600 |
|                                                                                   | H               | -2.35769900 | -1.91857100 | -0.53586900 |
|                                                                                   | H               | -2.45938100 | -1.11862300 | 1.04749000  |
|                                                                                   | H               | -2.37868000 | 0.25620400  | -1.68810800 |
|                                                                                   | H               | -3.72885800 | 0.32549300  | -0.55161100 |
|                                                                                   | N               | -0.65576900 | 0.93729500  | 0.61287400  |
|                                                                                   | O               | 0.04203300  | -0.87830000 | -1.09348200 |
|                                                                                   | K               | 2.47095800  | -0.39344100 | -0.18846300 |
|                                                                                   | O               | 0.13709400  | -1.49052700 | 1.04776600  |
|                                                                                   | H               | -0.63354800 | 0.94526500  | 1.62849400  |
|                                                                                   | H               | -0.38812700 | -1.49373200 | 1.85962000  |
|                                                                                   | O               | 1.73300500  | 2.01998100  | -0.06405200 |
|                                                                                   | H               | 1.96675000  | 2.37302200  | 0.80348000  |
| H                                                                                 | 0.22381600      | 1.43473100  | 0.26300700  |             |
| E = -1038.8699275 a.u.                                                            |                 |             |             |             |

| Compound                                                                            | XYZ Coordinates      |             |             |             |  |
|-------------------------------------------------------------------------------------|----------------------|-------------|-------------|-------------|--|
| potassium 4-aminobutyrate                                                           | 0 1                  |             |             |             |  |
| 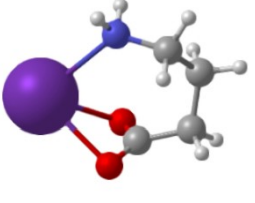 | C                    | -1.68527400 | 1.33721700  | -0.37044200 |  |
|                                                                                     | C                    | -0.05113400 | -1.30677600 | -0.06088800 |  |
|                                                                                     | C                    | -1.57696300 | -1.25269700 | -0.10990200 |  |
|                                                                                     | C                    | -2.13376400 | 0.08953600  | 0.40198600  |  |
|                                                                                     | H                    | -2.45920300 | 2.11014400  | -0.26671400 |  |
|                                                                                     | H                    | -1.61185000 | 1.10940000  | -1.43885000 |  |
|                                                                                     | H                    | -1.91375800 | -1.42476600 | -1.13613600 |  |
|                                                                                     | H                    | -1.97897300 | -2.05785500 | 0.51468000  |  |
|                                                                                     | H                    | -3.22691000 | 0.03828500  | 0.35764800  |  |
|                                                                                     | H                    | -1.87772100 | 0.21024900  | 1.46134600  |  |
|                                                                                     | N                    | -0.36632300 | 1.85242700  | 0.07276200  |  |
|                                                                                     | O                    | 0.58413800  | -1.26759600 | -1.15523600 |  |
|                                                                                     | K                    | 2.12088100  | 0.50780100  | 0.04468400  |  |
|                                                                                     | O                    | 0.49680500  | -1.31551600 | 1.08052000  |  |
|                                                                                     | H                    | -0.16910300 | 2.69992200  | -0.45646600 |  |
|                                                                                     | H                    | -0.45969700 | 2.16062300  | 1.03935100  |  |
|                                                                                     | E = -962.475935 a.u. |             |             |             |  |



#### 4. Calculated solubility data

The solubilities of acetylene in 2-pyrrolidone, DMSO and NMP were obtained by COSMO-RS<sup>3</sup> calculations as shown in Table S2. The results show that the solubility of acetylene in DMSO and NMP is almost twice as much as in 2- pyrrolidone under the same conditions.

**Table S2.** Predicted acetylene solubility (P=0.1MPa)

| T/K    | Solvent        | Acetylene solubility (mole fraction) |
|--------|----------------|--------------------------------------|
| 303.15 | 2- pyrrolidone | 0.051                                |
|        | DMSO           | 0.095                                |
|        | NMP            | 0.105                                |
| 423.15 | 2- pyrrolidone | 0.006                                |
|        | DMSO           | 0.008                                |
|        | NMP            | 0.008                                |

#### 5. <sup>1</sup>H NMR spectrum for product NVP

The purified product NVP is analyzed by <sup>1</sup>H NMR as shown in Fig. S1. There are four different methylene groups and one monohydrogen group in the compound, which is consistent with the structure of NVP. Also, there are few spurious peaks in the figure, which can prove the high purity of the product.

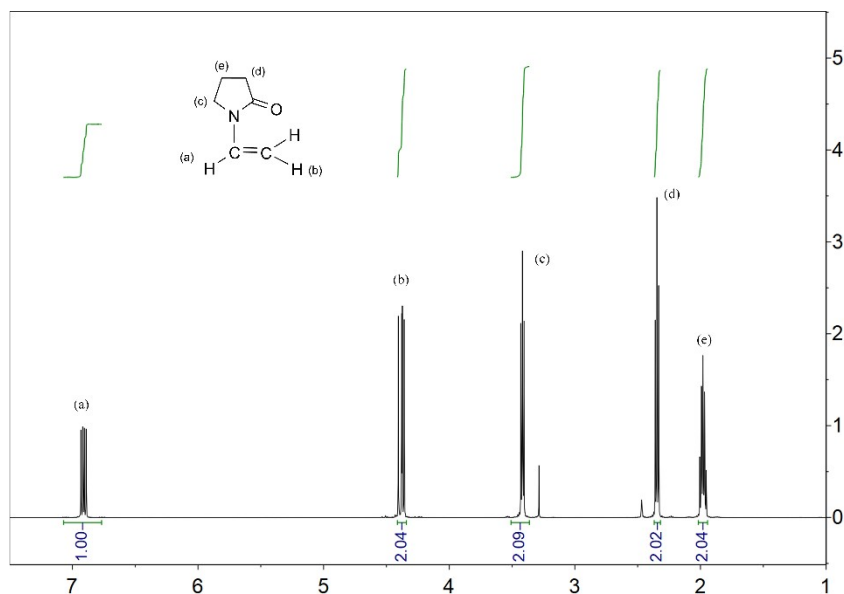

**Fig. S1** <sup>1</sup>H NMR spectrum for product NVP

## Reference

1. J. George and N. V. Sastry, *Journal of Chemical & Engineering Data*, 2004, **49**, 235-242.
2. D. O. Kashinski, G. M. Chase, R. G. Nelson, O. E. Di Nallo, A. N. Scales, D. L. VanderLey and E. F. Byrd, *J Phys Chem A*, 2017, **121**, 2265-2273.
3. A. Klamt, *J Phys Chem-Us*, 1995, **99**, 2224-2235.
4. C. Legault, CYLview20, Université de Sherbrooke, 2020.
